# Supplementary material for: Molecular characterisation of the tick Rhipicephalus microplus in Malaysia: new insights into the cryptic diversity and distinct genetic assemblages throughout the world
Source: PubMed Central journal article supplement (PMC4482097; doi:10.1186/s13071-015-0956-5), 2015-06-24
Supplement: 13071_2015_956_MOESM1_ESM.pdf [file 13071_2015_956_MOESM1_ESM.pdf]

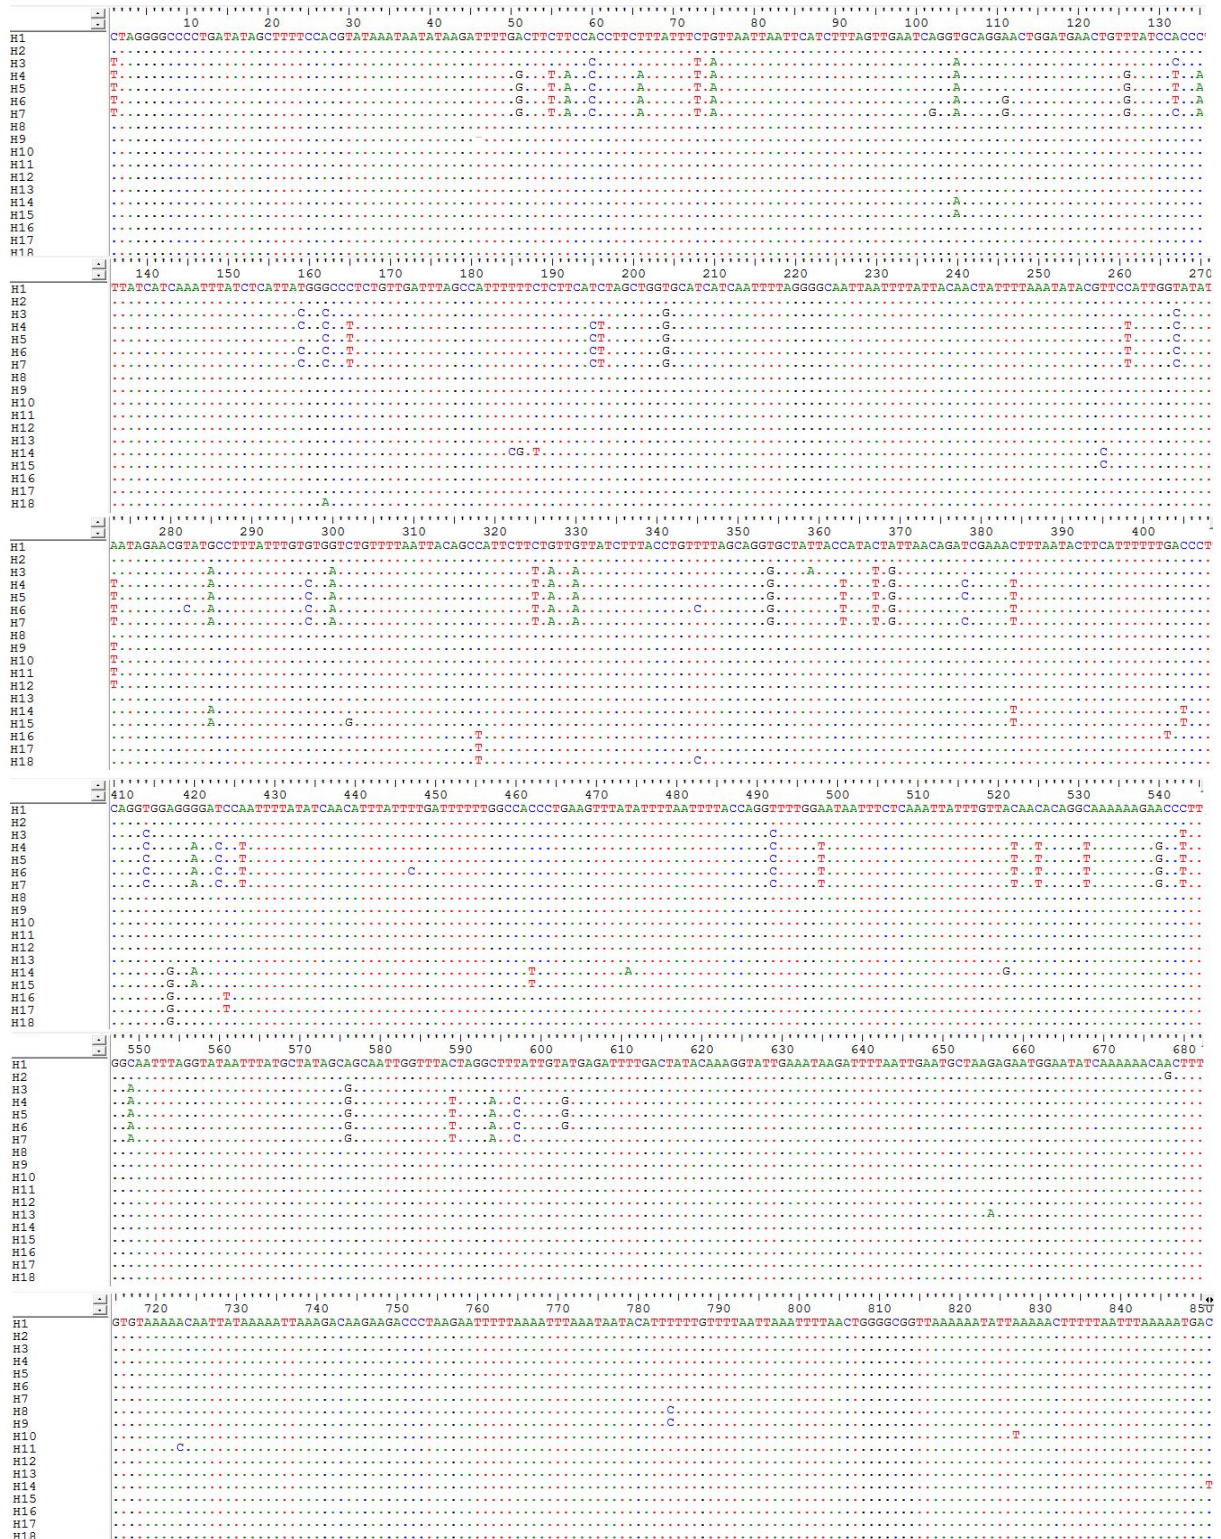

**Figure S1** Sequence alignment of *R. microplus* haplotypes (H1-H18 ) based on COI+16S rRNA genes
